# Supplementary material for: New Allyl Derivative of Curcumin: Synthesis and Crystal Structure of (1E, 6E)-4-Allyl-1,7-bis(4′-Allyloxy-3′-Methoxyphenyl)hepta-1,6-Diene-3,5-Dione
Source: Preprints.org preprint supplement (doi:10.20944/preprints202409.2182.v1), 2024-09-27
Supplement: Supplementary file 2 [file supplementary]

## SUPPORTING INFORMATION

# New Allyl Derivative of Curcumin: Synthesis and Crystal Structure of (1*E*,6*E*)-4-allyl-1,7-bis(4'-allyloxy-3'-methoxyphenyl)hepta-1,6-diene-3,5-dione

Anna A. Druzina <sup>1,\*</sup>, Olga B. Zhidkova <sup>1</sup>, Sergey A. Anufriev <sup>1</sup>, Ekaterina V. Dubasova <sup>2</sup>, Ivan V. Ananyev <sup>1,2</sup>, Samya Banerjee <sup>3</sup>, Igor B. Sivaev <sup>1,4</sup> and Vladimir I. Bregadze <sup>1</sup>

<sup>1</sup> A.N. Nesmeyanov Institute of Organoelement Compounds, Russian Academy of Sciences, 28 Vavilov Str., 119991 Moscow, Russia; [ilnova\\_anna@mail.ru](mailto:ilnova_anna@mail.ru) (A.A.D.); [zolga57@mail.ru](mailto:zolga57@mail.ru) (O.B.Z.); [trueman476@mail.ru](mailto:trueman476@mail.ru) (S.A.A.); [sivaev@ineos.ac.ru](mailto:sivaev@ineos.ac.ru) (S.I.B.); [bre@ineos.ac.ru](mailto:bre@ineos.ac.ru) (V.I.B.);

<sup>2</sup> N.S. Kurnakov Institute of General and Inorganic Chemistry, Russian Academy of Sciences, 31 Leninsky Avenue, 119991 Moscow, Russia; [i.ananyev@gmail.com](mailto:i.ananyev@gmail.com) (I.V.A.); [dubasova.ek@gmail.com](mailto:dubasova.ek@gmail.com) (E.V.D.);

<sup>3</sup> Department of Chemistry, Indian Institute of Technology (BHU), Varanasi, UP-221005 India; [sam.ban40@gmail.com](mailto:sam.ban40@gmail.com) (S.B.);

<sup>4</sup> Basic Department of Chemistry of Innovative Materials and Technologies, G.V. Plekhanov Russian University of Economics, 36 Stremyannyi Line, 117997 Moscow, Russia

\* Correspondence: [ilnova\\_anna@mail.ru](mailto:ilnova_anna@mail.ru)

**Citation:** To be added by editorial staff during production.

<sup>1</sup>H and <sup>13</sup>C NMR, IR and high-resolution mass spectra of compound **2**

Academic Editor: Firstname

Lastname

Received: date

Revised: date

Accepted: date

Published: date

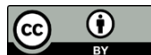

**Copyright:** © 2024 by the authors.  
Submitted for possible open access publication under the terms and conditions of the Creative Commons Attribution (CC BY) license (<https://creativecommons.org/licenses/by/4.0/>).

## Display Report

### Analysis Info

Analysis Name D:\Data\Ilyushenkova\DA-66.d  
Method tune\_100-1200.m  
Sample Name DA-66  
Comment

Acquisition Date 19.09.2024 18:39:48

Operator BDAL@DE  
Instrument / Ser# maXis 43

### Acquisition Parameter

|             |          |                      |          |                  |           |
|-------------|----------|----------------------|----------|------------------|-----------|
| Source Type | ESI      | Ion Polarity         | Positive | Set Nebulizer    | 1.0 Bar   |
| Focus       | Active   |                      |          | Set Dry Heater   | 200 °C    |
| Scan Begin  | 50 m/z   | Set Capillary        | 4500 V   | Set Dry Gas      | 4.0 l/min |
| Scan End    | 1800 m/z | Set End Plate Offset | -500 V   | Set Divert Valve | Waste     |

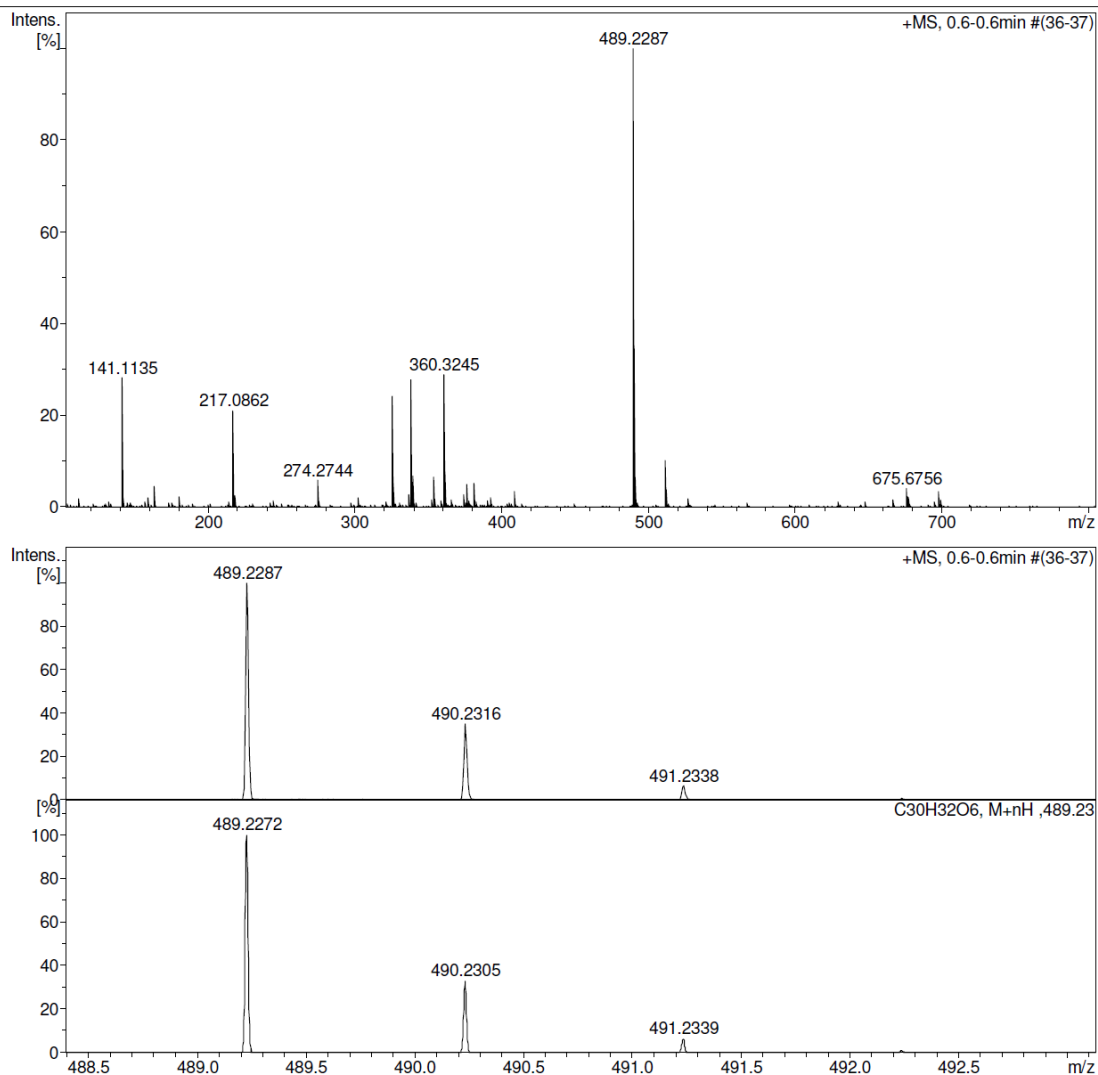

**Figure S1.** ESI-HRMS spectrum of compound 2

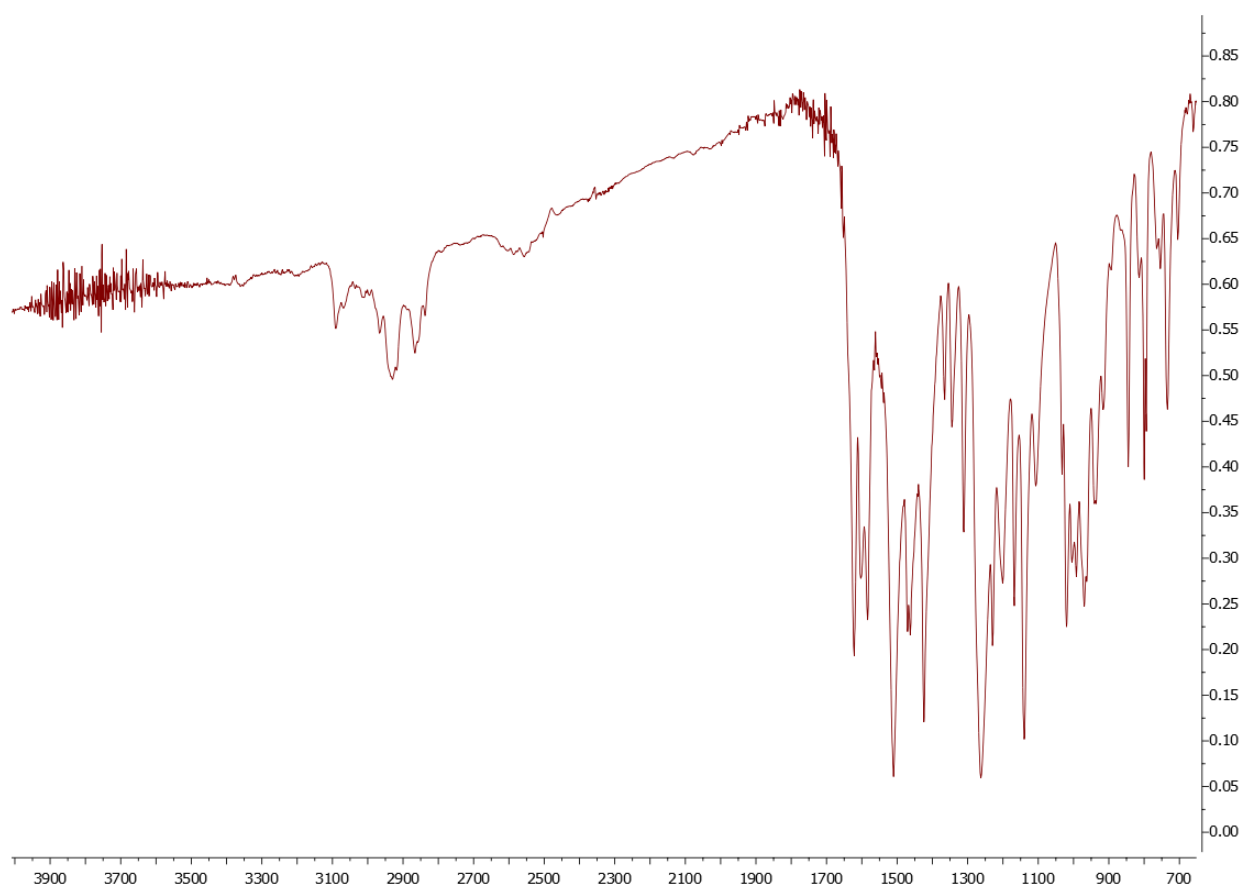

**Figure S2.** IR spectrum of compound **2**

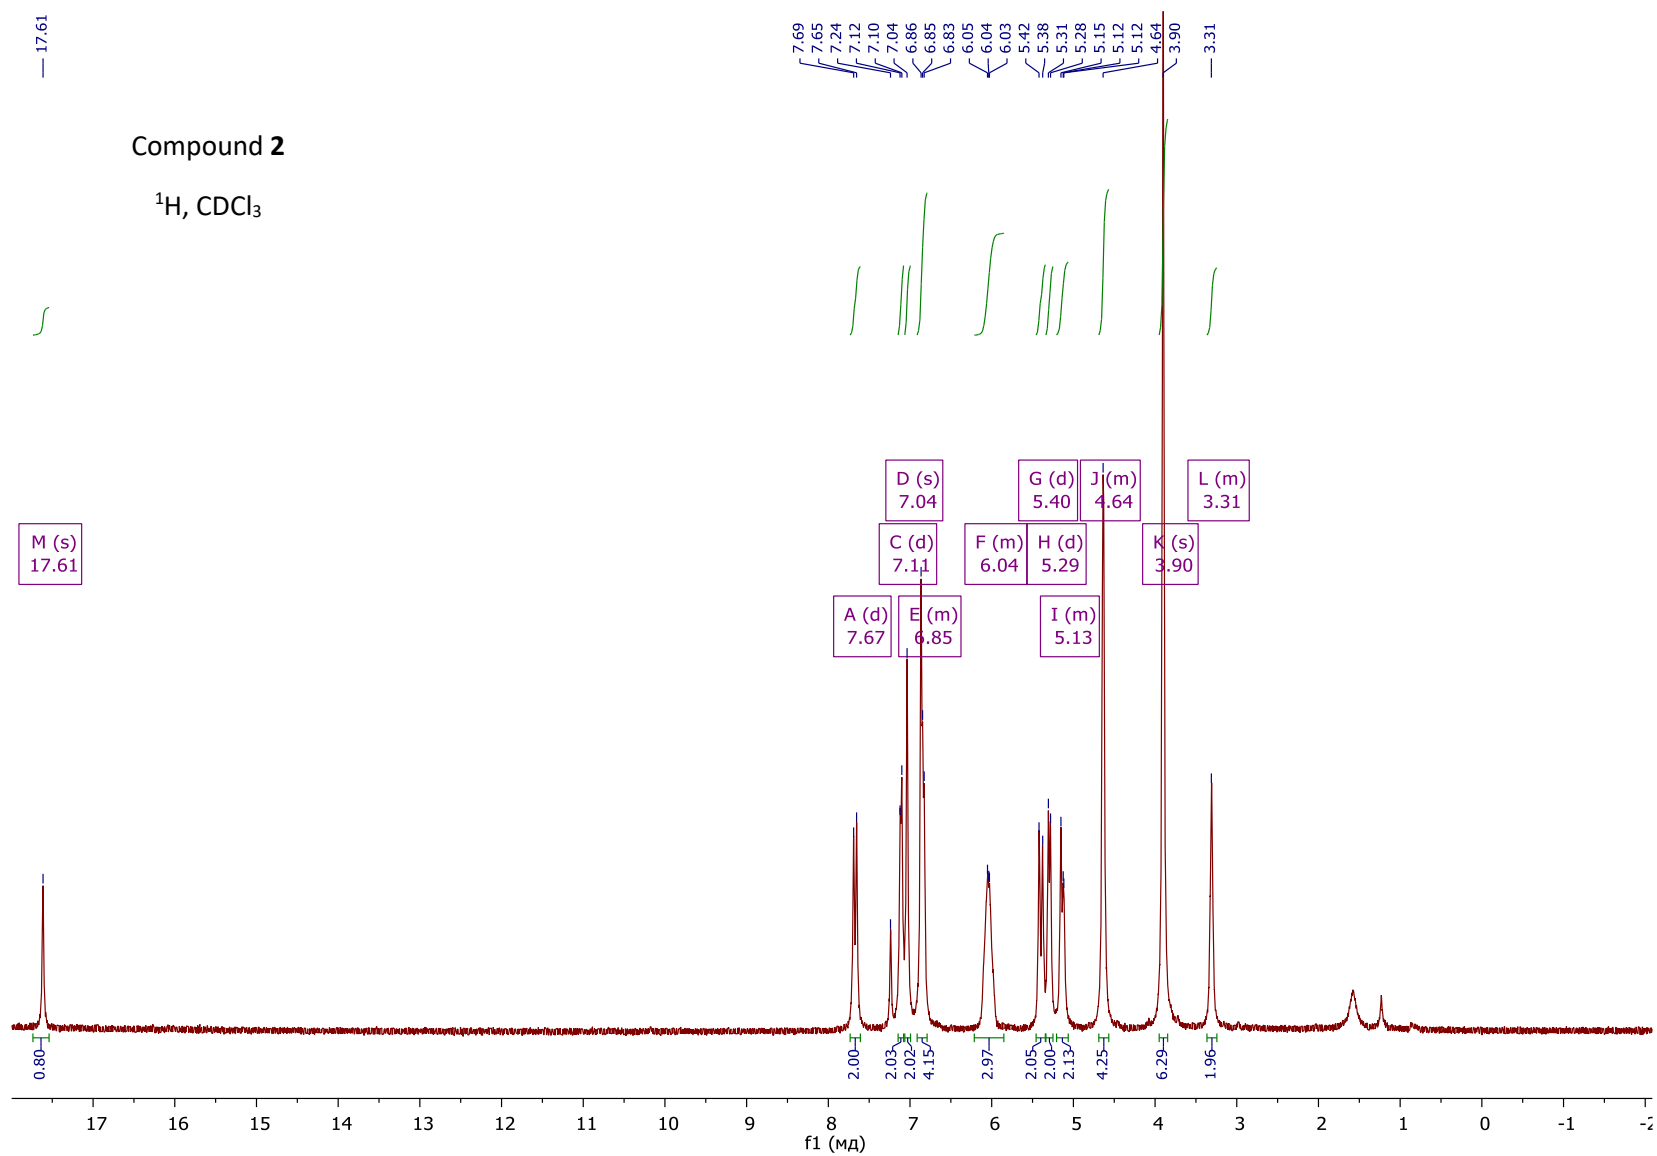

Figure S3.  $^1\text{H}$  NMR spectrum of compound **2**

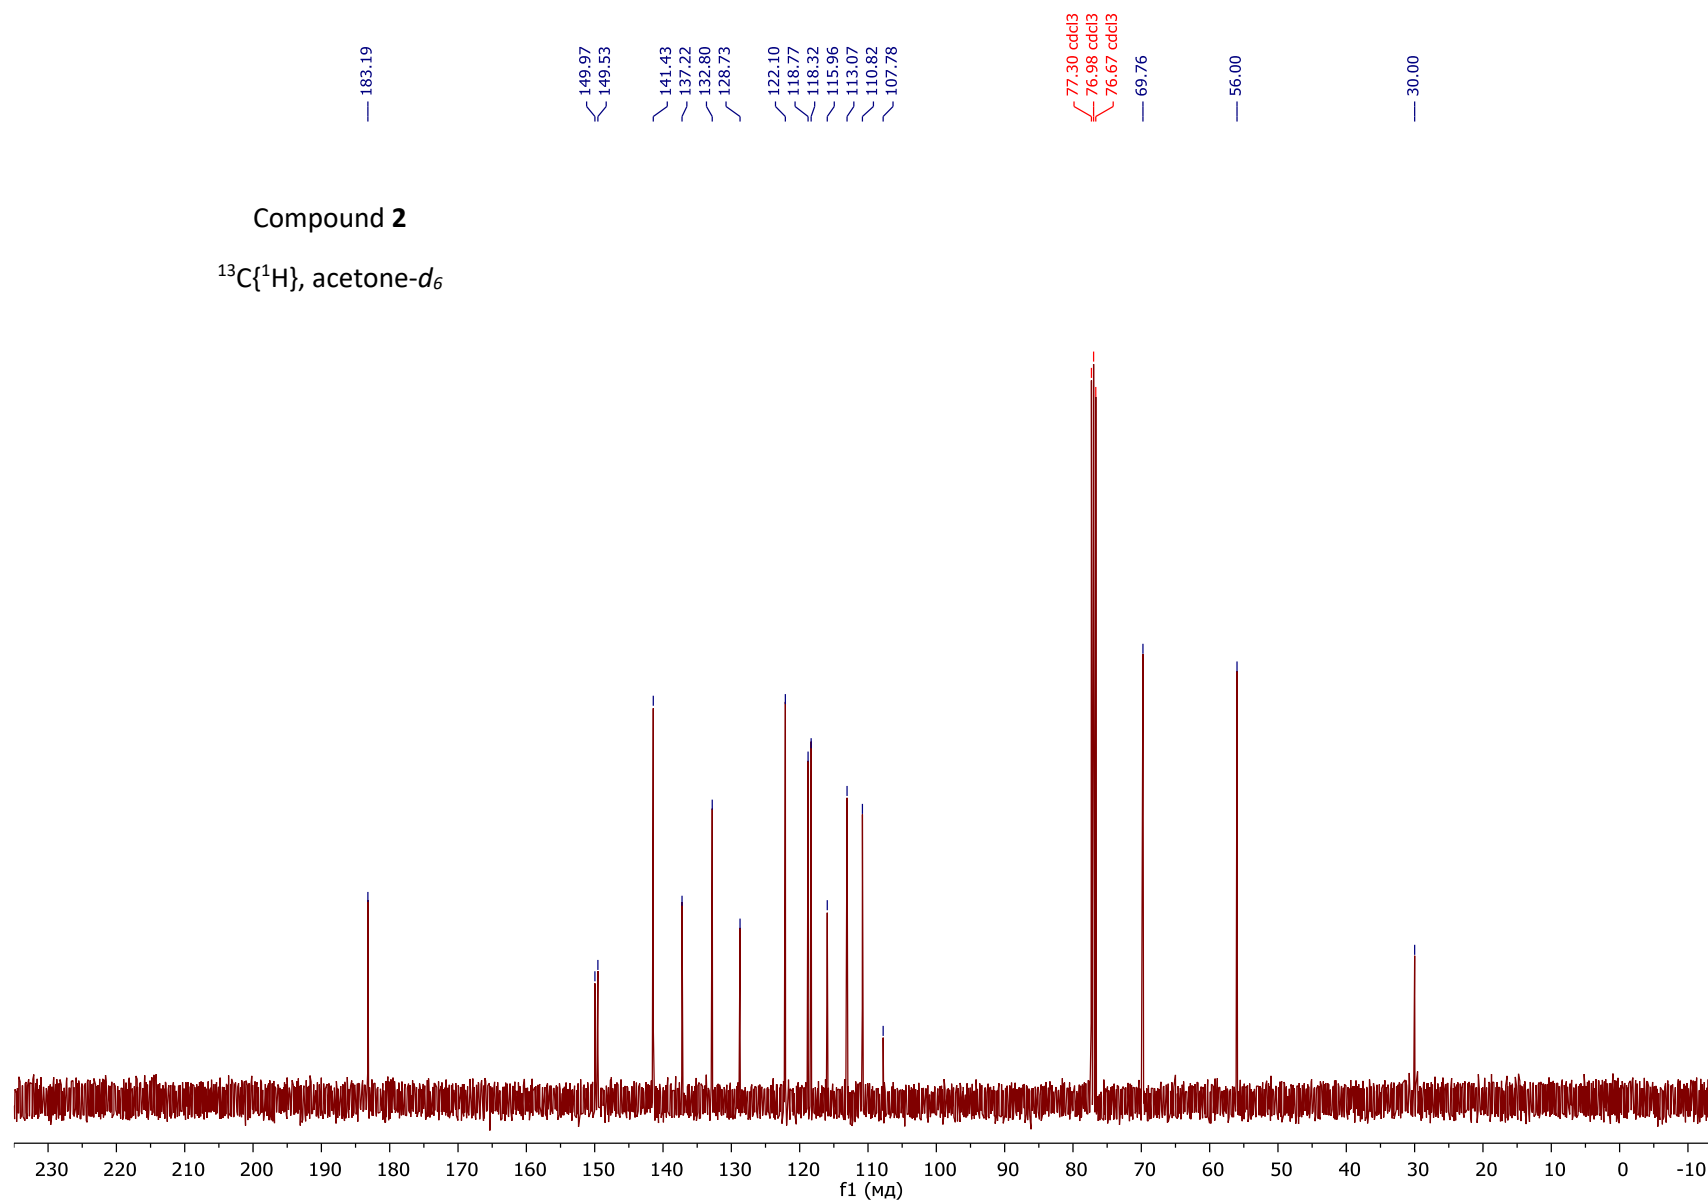

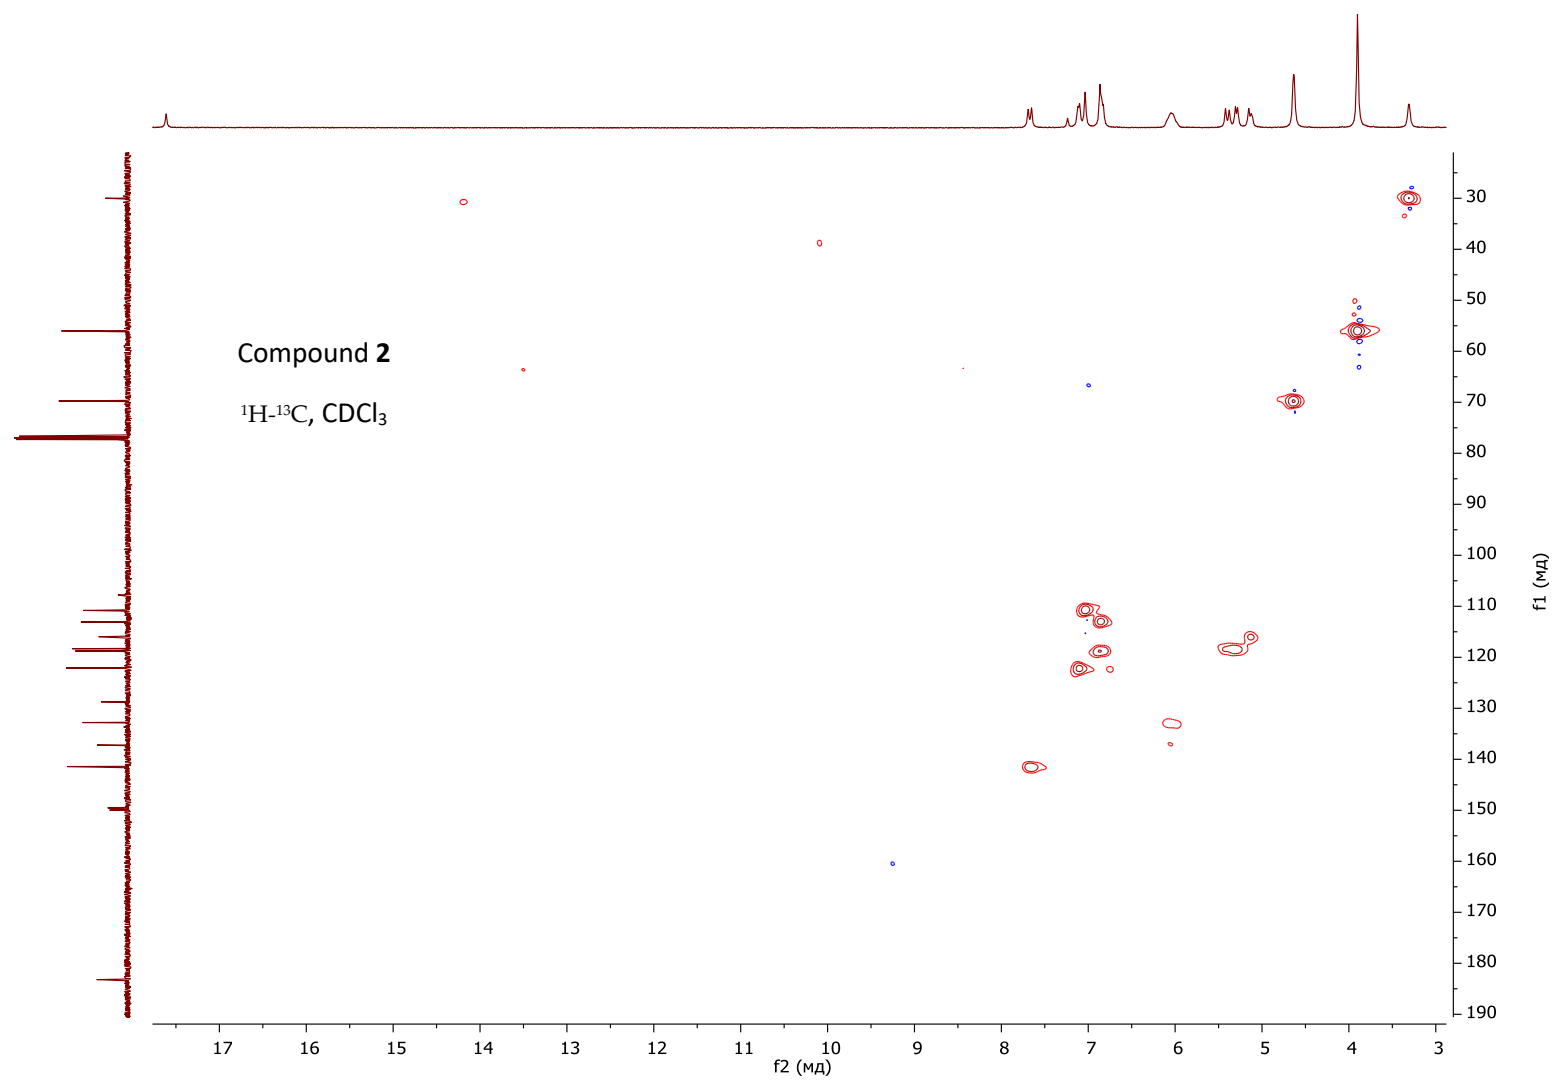

Figure S4.  $^1\text{H}$ - $^{13}\text{C}$  HMQC NMR spectrum of compound 2

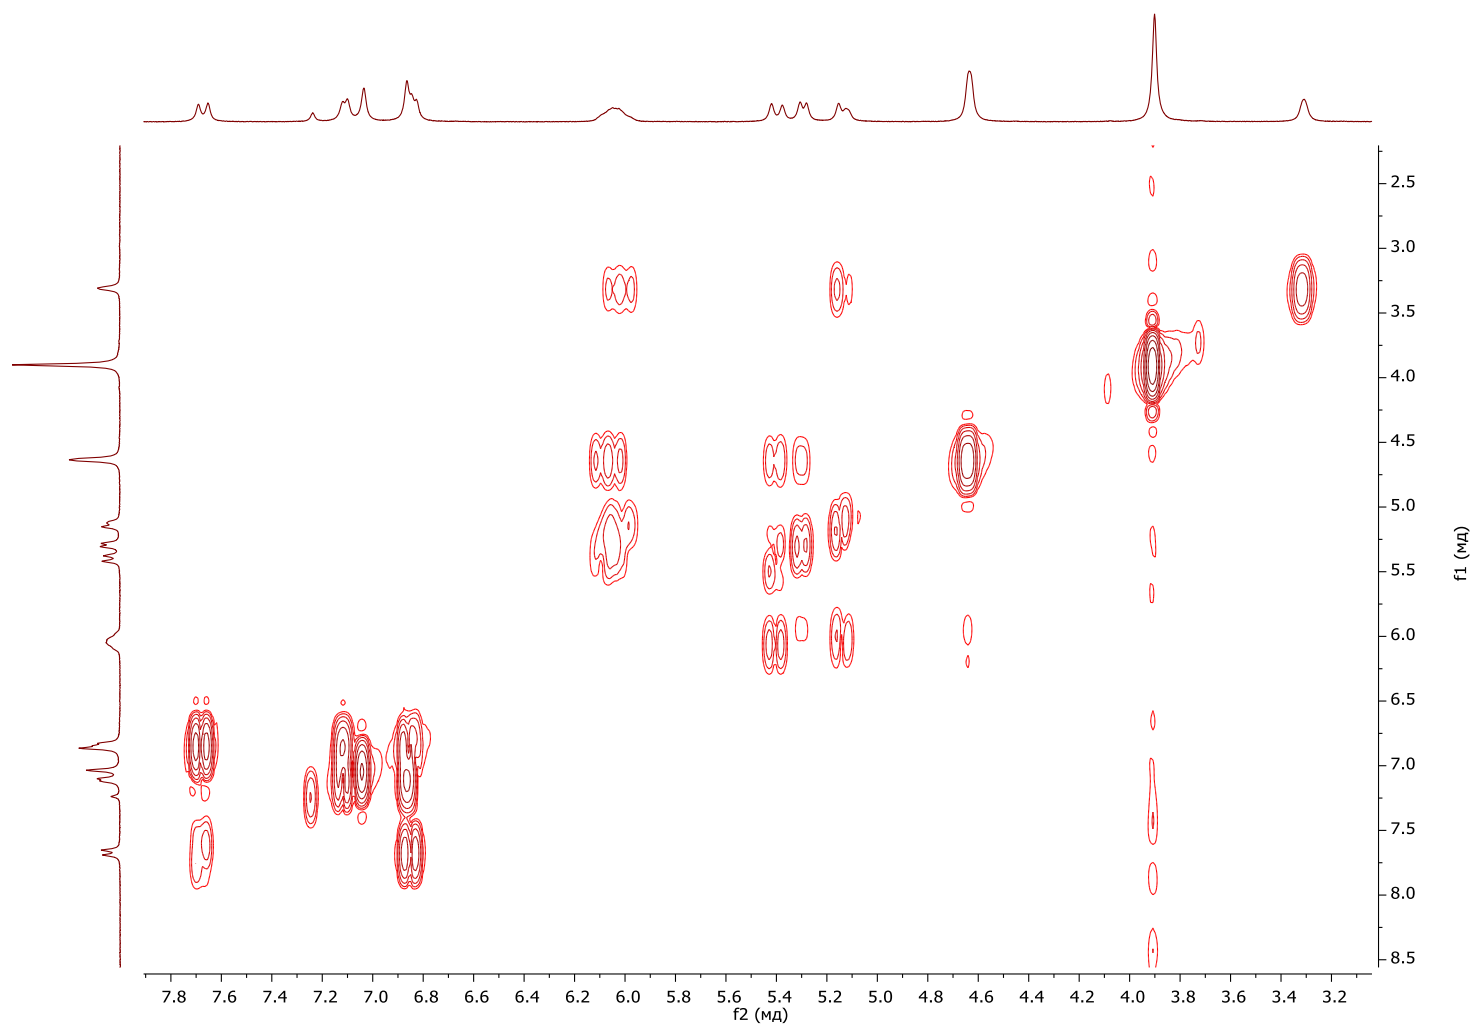

**Figure S4.**  $^1\text{H}$ - $^1\text{H}$  COSY NMR spectrum of compound 2
